# Supplementary material
Source: PubMed Central journal article supplement (PMC2259040)
Supplement: plntphys_pp.107.110270_3.pdf [file plntphys_pp.107.110270_3.pdf]

Fig. S1. Genomic structures of the *Arabidopsis GeBP* and *GPL* genes. A, Schematic representation of *GeBP* and *GPL* genes. Exons are indicated by boxes and introns by thick lines. Gray and black areas represent the regions coding for the DNA-binding domain and the C-terminal domain, respectively. The location of transposons and T-DNAs are indicated by open arrowheads and closed arrowheads, respectively. Arrows indicate putative transcription start sites based on full-length-cDNAs or 5' ESTs annotated by TAIR. Asterisks represent 3' ends of transcripts based on full-length cDNAs or 3' ESTs by TAIR. B, Flanking sequences in *gebp/gpl* insertion lines. C, Transcript levels of *GeBP* and *GPL* genes in mutant lines. Numbers below lanes indicate the number of PCR cycles. Expression of the *EF1* gene was used as a loading control.
